# Supplementary material for: An Italian Survey and Focus Groups on Fibromyalgia Impairment: Impact on Work and Possible Reasonable Accommodations
Source: MDPI journal article supplement (doi:10.3390/healthcare12020216), 2024-01-16
Supplement: s1 [file s1]

## Supplementary materials

### Box S1. Survey-questionnaire (in original language).

1. *Genere*
  - a. Maschio
  - b. Femmina
2. *Età (inserire l'età in formato numerico)*
3. *In quale regione abiti? (elenco a discesa)*
4. *Con chi vivi?*
  - a. Da solo
  - b. Con altre persone
5. *Da quanti anni ti hanno diagnosticato la Fibromialgia?*
  - a. Meno di un anno
  - b. Da uno a cinque anni
  - c. Da cinque a dieci anni
  - d. Oltre 10 anni
6. *Attualmente lavori?*
  - a. Sì
  - b. No
7. *Da quanto tempo non lavori?*
  - a. Da meno di un anno
  - b. Da meno di cinque anni
  - c. Da meno di dieci anni
  - d. Da oltre dieci anni
  - e. Non ho mai lavorato
8. *Che tipologia di lavoro svolgi o svolgevi?*
  - a. Impiegato
  - b. Insegnante
  - c. Operaio
  - d. Operatore sanitario
  - e. Libero professionista
  - f. Altro
9. *Indica quale affermazione rispecchia meglio il tuo stato d'animo rispetto al lavoro:*
  - a. vado/andavo volentieri a lavoro, ne sono/ero molto/abbastanza soddisfatto
  - b. lavoro/lavoravo volentieri, ma ho/avevo alcuni problemi rilevanti
  - c. temo/temevo di poter perdere il mio posto di lavoro
  - d. non vado/andavo volentieri a lavoro
10. *Le difficoltà sul lavoro causate dalla Fibromialgia dipendono da: (risposta multipla)*
  - a. Ansia
  - b. Relazioni interpersonali negative
  - c. scarsa lucidità causata dall'assunzione delle medicine
  - d. Senso di tristezza
  - e. Sintomi di stanchezza cronica
  - f. Variabilità del dolore
  - g. Variabilità dell'umore
11. *Quando ho un problema/una difficoltà legata alla Fibromialgia o ai farmaci che prendo per i suoi sintomi preferisco non parlarne*
  - a. Sì
  - b. No
12. *Quando ho un problema/una difficoltà legata alla Fibromialgia o ai farmaci che prendo per i suoi sintomi so a chi rivolgermi nel lavoro per avere un aiuto/supporto*
  - a. Sì

- b. No
13. *Quando ho un problema/una difficoltà legata alla Fibromialgia o ai farmaci che prendo per i suoi sintomi sento molta solidarietà tra i colleghi attorno a me*
- a. Sì  
b. No
14. *Quando ho un problema/una difficoltà legata alla Fibromialgia o ai farmaci che prendo per i suoi sintomi il medico competente/l'RLS sono un riferimento importante*
- a. Sì  
b. No
15. *Quando ho un problema/una difficoltà legata alla Fibromialgia o ai farmaci che prendo per i suoi sintomi i sindacati aziendali sono un riferimento importante*
- a. Sì  
b. No
16. *Quando ho un problema/una difficoltà legata alla Fibromialgia o ai farmaci che prendo per i suoi sintomi il datore di lavoro/responsabile personale/caporeparto sono un riferimento importante*
- a. Sì  
b. No
17. *Quando ho un problema/una difficoltà legata alla Fibromialgia generalmente le persone nel mio ambiente di lavoro conoscono la Fibromialgia e cosa comporta*
- a. Sì  
b. No
18. *Quando ho un problema/una difficoltà legata alla Fibromialgia generalmente mi credono quando riferisco i problemi che ho*
- a. Sì  
b. No
19. *Come valuti le tue relazioni con i tuoi responsabili o con i datori di lavoro? (risposta multipla)*
- a. Ho la loro solidarietà  
b. Comprendono il mio stato di salute  
c. Non vengo coinvolto/a  
d. Vengo svalutato/a  
e. Ci sono stati degli episodi apertamente ostili
20. *Come valuti le tue relazioni con i colleghi? (risposta multipla)*
- a. Ho la loro solidarietà  
b. Comprendono il mio stato di salute  
c. Non vengo coinvolto/a  
d. Vengo svalutato/a  
e. Ci sono stati degli episodi apertamente ostili
21. *Hai trovato difficoltà legate all'organizzazione del lavoro, alla ripartizione dei compiti o alla mansione assegnata?*
- a. Mai avuto difficoltà di questo tipo legate alla Fibromialgia  
b. Una sola volta e l'ho risolta  
c. Una sola volta e non l'ho risolta  
d. Più volte e le ho sempre o quasi sempre risolte  
e. Più volte e non le ho mai o quasi mai risolte
22. *Hai avuto difficoltà legate agli orari (es. entrata/uscita, accesso al part time), alla presenza (es. assenze ripetute per malattia) e ritmi di lavoro (es. pause)?*
- a. Mai avuto difficoltà di questo tipo legate alla Fibromialgia  
b. Una sola volta e l'ho risolta  
c. Una sola volta e non l'ho risolta  
d. Più volte e le ho sempre o quasi sempre risolte  
e. Più volte e non le ho mai o quasi mai risolte

23. *Hai trovato difficoltà legate all'ambiente fisico, ai locali, alle strutture (es. lunghi tratti da percorrere a piedi, scale, luminosità)?*
- Mai avuto difficoltà di questo tipo legate alla Fibromialgia
  - Una sola volta e l'ho risolta
  - Una sola volta e non l'ho risolta
  - Più volte e le ho sempre o quasi sempre risolte
  - Più volte e non le ho mai o quasi mai risolte
24. *Hai trovato difficoltà legate alla postazione o alla seduta (es. in relazione all'ergonomia)?*
- Mai avuto difficoltà di questo tipo legate alla Fibromialgia
  - Una sola volta e l'ho risolta
  - Una sola volta e non l'ho risolta
  - Più volte e le ho sempre o quasi sempre risolte
  - Più volte e non le ho mai o quasi mai risolte
25. *Hai trovato difficoltà legate alle regole o a prassi aziendali?*
- Mai avuto difficoltà di questo tipo legate alla Fibromialgia
  - Una sola volta e l'ho risolta
  - Una sola volta e non l'ho risolta
  - Più volte e le ho sempre o quasi sempre risolte
  - Più volte e non le ho mai o quasi mai risolte
26. *Hai trovato difficoltà legate all'attrezzatura o alle tecnologie utilizzate nel lavoro?*
- Mai avuto difficoltà di questo tipo legate alla Fibromialgia
  - Una sola volta e l'ho risolta
  - Una sola volta e non l'ho risolta
  - Più volte e le ho sempre o quasi sempre risolte
  - Più volte e non le ho mai o quasi mai risolte
27. *Hai trovato difficoltà ad avere una promozione o migliorare l'inquadramento?*
- Mai avuto difficoltà di questo tipo legate alla Fibromialgia
  - Una sola volta e l'ho risolta
  - Una sola volta e non l'ho risolta
  - Più volte e le ho sempre o quasi sempre risolte
  - Più volte e non le ho mai o quasi mai risolte
28. *Quando hai un problema sul lavoro, dovuto alla Fibromialgia, quali aspetti potrebbero aiutarti? (risposta multipla)*
- Essere creduto
  - Cambiamento di condizioni ambientali fisiche
  - Cambiamento di mansione
  - Cambiamento di orario
  - Modifiche procedurali e organizzative
  - Altro
29. *Se puoi, indica l'elemento che nella tua esperienza è stato più FACILITANTE nel risolvere le tue problematiche relative alla Fibromialgia, in qualunque ambito ma facendo esempi concreti. (risposta aperta)*
30. *Quando hai un problema sul lavoro, dovuto alla Fibromialgia, quali aspetti sono di maggiore ostacolo? (risposta multipla)*
- Non essere creduto
  - Ambiente fisico
  - Incompatibilità dell'assunzione dei farmaci con guida/uso di apparecchiature
  - Tipologia delle mansioni
  - Orari di lavoro
  - Procedure e organizzazione del lavoro
  - Altro
31. *Se puoi, indica l'elemento che nella tua esperienza è stato più OSTACOLANTE, in qualunque ambito ma facendo esempi concreti. (risposta aperta)*

**Box S2.** Complete list of questions used in the FG study.

|                                                                                                                                                                                                                                                                                                                                                                                                                                                                                                                                                                                                                                                                                                                                                                                                                                                                                                                     |
|---------------------------------------------------------------------------------------------------------------------------------------------------------------------------------------------------------------------------------------------------------------------------------------------------------------------------------------------------------------------------------------------------------------------------------------------------------------------------------------------------------------------------------------------------------------------------------------------------------------------------------------------------------------------------------------------------------------------------------------------------------------------------------------------------------------------------------------------------------------------------------------------------------------------|
| <p><b>Icebreaker question</b></p> <p>Each participant was invited to tell a real experience and an invented one. The other participants then had to guess which of the two experiences was the invented one.</p> <p><b>Transition question</b> (after a brief presentation of the survey preliminary results)</p> <p>“How coherent your experience was with the survey findings?”.</p> <p><b>Key questions</b></p> <ol style="list-style-type: none"> <li>“How do you think it would be possible to overcome the obstacle of not being believed by your colleagues or supervisors/employers in the workplace?”, “If one of you was able to overcome the issue, how did you do it? Which strategies and facilitators?”</li> <li>“How do you think workplaces could be improved?”, “Which obstacles or barriers would you like to remove?”, “Which supports or facilitators would you like to introduce?”.</li> </ol> |
|---------------------------------------------------------------------------------------------------------------------------------------------------------------------------------------------------------------------------------------------------------------------------------------------------------------------------------------------------------------------------------------------------------------------------------------------------------------------------------------------------------------------------------------------------------------------------------------------------------------------------------------------------------------------------------------------------------------------------------------------------------------------------------------------------------------------------------------------------------------------------------------------------------------------|

**Table S1.** Consolidated criteria for reporting qualitative studies (COREQ): 32-item checklist.

| No.                                            | Item                    | Description                                                                                                                                                                                | Section #                                               |
|------------------------------------------------|-------------------------|--------------------------------------------------------------------------------------------------------------------------------------------------------------------------------------------|---------------------------------------------------------|
| <b>Domain 1: Research team and reflexivity</b> |                         |                                                                                                                                                                                            |                                                         |
| Personal characteristics                       |                         |                                                                                                                                                                                            |                                                         |
| 1.                                             | Interviewer/facilitator | <i>Which author/s conducted the interview or focus group?</i> MT                                                                                                                           | Materials and Methods/Focus Group Study/Data collection |
| 2.                                             | Credentials             | <i>What were the researcher’s credentials?</i><br>MT is MSc in Clinical Psychology and Cognitive-Behavioral Psychotherapist with expertise in the treatment of Fibromyalgia (FM) patients. | Title page                                              |
| 3.                                             | Occupation              | <i>What was their occupation at the time of the study?</i><br>Researcher in psychological and epidemiological aspects of chronic pain and FM at the ISAL Foundation.                       | /                                                       |
| 4.                                             | Gender                  | <i>Was the researcher male or female?</i> Male                                                                                                                                             | /                                                       |
| 5.                                             | Experience and training | <i>What experience or training did the researcher have?</i>                                                                                                                                | /                                                       |

|                                |                                          |                                                                                                                                                                                                                                                                                           |                                                            |
|--------------------------------|------------------------------------------|-------------------------------------------------------------------------------------------------------------------------------------------------------------------------------------------------------------------------------------------------------------------------------------------|------------------------------------------------------------|
|                                |                                          | MT received a specific university training in Focus Group (FG) conduction.                                                                                                                                                                                                                |                                                            |
| Relationship with participants |                                          |                                                                                                                                                                                                                                                                                           |                                                            |
| 6.                             | Relationship established                 | <p><i>Was a relationship established prior to study commencement?</i></p> <p>FM individuals had no prior relationship with the interviewer before the FGs.</p>                                                                                                                            | /                                                          |
| 7.                             | Participant knowledge of the interviewer | <p><i>What did the participants know about the researcher? E.g. Personal goals, reasons for doing the research</i></p> <p>The interviewers were introduced to participants just before the FGs started.</p>                                                                               | /                                                          |
| 8.                             | Interviewer characteristics              | <p><i>What characteristics were reported about the interviewer/facilitator? E.g. Bias, assumptions, reasons and interests in the research topic</i></p> <p>Participants were informed about the role of the interviewer in the ISAL Foundation and on aims and scope of the research.</p> | /                                                          |
| Domain 2: Study design         |                                          |                                                                                                                                                                                                                                                                                           |                                                            |
| Theoretical framework          |                                          |                                                                                                                                                                                                                                                                                           |                                                            |
| 9.                             | Methodological orientation and theory    | <p><i>What methodological orientation was stated to underpin the study? E.g. grounded theory, discourse analysis, ethnography, phenomenology, content analysis</i></p> <p>Thematic analysis</p>                                                                                           | Materials and Methods/<br>Data analysis                    |
| Participant selection          |                                          |                                                                                                                                                                                                                                                                                           |                                                            |
| 10.                            | Sampling                                 | <p><i>How were participants selected? E.g. purposive, convenience, consecutive, snowball</i></p> <p>Convenience: FM individuals who declared to have experienced difficulties in the work environment were invited to participate.</p>                                                    | Materials and Methods/Focus Group Study/Subjects enrolment |
| 11.                            | Method of approach                       | <i>How were participants approached? E.g. face-to-face, telephone, mail, email</i>                                                                                                                                                                                                        | Materials and Methods/Focus Group Study/Subjects enrolment |

|                 |                              |                                                                                                                                                                                                                                                                                                |                                                         |
|-----------------|------------------------------|------------------------------------------------------------------------------------------------------------------------------------------------------------------------------------------------------------------------------------------------------------------------------------------------|---------------------------------------------------------|
|                 |                              | Posts on the Facebook page and groups of CFU-Italia Odv. Then, FM sufferers communicated their interest in participating via email. These individuals were contacted by telephone to verify the eligibility criteria.                                                                          |                                                         |
| 12.             | Sample size                  | <i>How many participants were in the study?</i><br>15 (all females)                                                                                                                                                                                                                            | Results                                                 |
| 13.             | Non-participation            | <i>How many people refused to participate or dropped out? What were the reasons for this?</i><br><br>No participant admitted to the study refused to participate or dropped out.                                                                                                               | /                                                       |
| Setting         |                              |                                                                                                                                                                                                                                                                                                |                                                         |
| 14.             | Setting of data collection   | <i>Where was the data collected? E.g. home, clinic, workplace</i><br><br>Data for the 1 <sup>st</sup> FG were collected in the headquarter of CFU-Italia Odv, in Castenaso. Data for the 2 <sup>nd</sup> FG were collected in Rome, at an Italian Workers' Trade Unions Confederation offices. | Materials and Methods/Focus Group Study/Data collection |
| 15.             | Presence of non-participants | <i>Was anyone else present besides the participants and researchers?</i><br><br>One mother of a participant in Rome FG was present.                                                                                                                                                            | /                                                       |
| 16.             | Description of sample        | <i>What are the important characteristics of the sample? E.g. demographic data, date</i> See "Focus Group results"                                                                                                                                                                             | Results                                                 |
| Data collection |                              |                                                                                                                                                                                                                                                                                                |                                                         |
| 17.             | Interview guide              | <i>Were questions, prompts, guides provided by the authors?</i> Yes<br><br><i>Was it pilot tested?</i> No                                                                                                                                                                                      | Supplementary material 2                                |
| 18.             | Repeat interviews            | <i>Were repeat interviews carried out? If yes, how many?</i>                                                                                                                                                                                                                                   | /                                                       |

|                                        |                                |                                                                                                                                                                                                            |                                                         |
|----------------------------------------|--------------------------------|------------------------------------------------------------------------------------------------------------------------------------------------------------------------------------------------------------|---------------------------------------------------------|
|                                        |                                | N.A.                                                                                                                                                                                                       |                                                         |
| 19.                                    | Audio/visual recording         | <p><i>Did the research use audio or visual recording to collect the data?</i></p> <p>Yes, audio and video recorded</p>                                                                                     | Materials and Methods/Focus Group Study/Data collection |
| 20.                                    | Field notes                    | <p><i>Were field notes made during and/or after the interview or focus group?</i></p> <p>Yes, during the FGs from the observer</p>                                                                         | /                                                       |
| 21.                                    | Duration                       | <p><i>What was the duration of the interviews or focus group?</i></p> <p>2 hours</p>                                                                                                                       | Research Design and Methods/Data collection             |
| 22.                                    | Data saturation                | <p><i>Was data saturation discussed?</i></p> <p>The two FG provided similar results, no further FG were then organized taking also into account the extreme difficulties that FM sufferers encounters.</p> | Method                                                  |
| 23.                                    | Transcripts returned           | <p><i>Were transcripts returned to participants for comment and/or correction? No</i></p>                                                                                                                  | /                                                       |
| <b>Domain 3: analysis and findings</b> |                                |                                                                                                                                                                                                            |                                                         |
| Data analysis                          |                                |                                                                                                                                                                                                            |                                                         |
| 24.                                    | Number of data coders          | <p><i>How many data coders coded the data?</i> Two data coders (MT and MP) and 1 reviewer (VT).</p>                                                                                                        | Research Design and Methods/Data analysis               |
| 25.                                    | Description of the coding tree | <p><i>Did authors provide a description of the coding tree?</i> No, only the final results in terms of the themes/subthemes emerged is presented</p>                                                       | Results/Table 5                                         |
| 26.                                    | Derivation of themes           | <p><i>Were themes identified in advance or derived from the data?</i> Both</p>                                                                                                                             | Materials and Methods/Data analysis and Table 5         |
| 27.                                    | Software                       | <p><i>What software, if applicable, was used to manage the data?</i> No software was used; transcription were recorded in Microsoft Word.</p>                                                              | /                                                       |
| 28.                                    | Participant checking           | <p><i>Did participants provide feedback on the findings?</i></p>                                                                                                                                           | /                                                       |

|           |                              |                                                                                                                                                                                                                             |                                           |
|-----------|------------------------------|-----------------------------------------------------------------------------------------------------------------------------------------------------------------------------------------------------------------------------|-------------------------------------------|
|           |                              | No, but an invitation to a free webinar on research results were sent to all participants and CFU-Italia Odv members.                                                                                                       |                                           |
| Reporting |                              |                                                                                                                                                                                                                             |                                           |
| 29.       | Quotations presented         | <p><i>Were participant quotations presented to illustrate the themes / findings? Yes.</i></p> <p><i>Was each quotation identified? E.g. Participant number</i></p> <p>Quotations were not identified</p>                    | Results                                   |
| 30.       | Data and findings consistent | <p><i>Was there consistency between the data presented and the findings?</i></p> <p>Yes</p>                                                                                                                                 | /                                         |
| 31.       | Clarity of major themes      | <p>Were major themes clearly presented in the findings?</p> <p>Yes, each theme had a section</p>                                                                                                                            | Results                                   |
| 32.       | Clarity of minor themes      | <p><i>Is there a description of diverse cases or discussion of minor themes?</i></p> <p>Yes, important unique opinions were taken into account together with specific sub-themes that inductively came out from the FGs</p> | Research Design and Methods/Data analysis |
